# Supplementary material
Source: publisher figshare collection journal article supplement (https://acs.figshare.com/ndownloader/files/22700261)
Supplement: Supplementary file 1 [file 22700261]

# Discovery of New Proxiphylline Based Chiral Cocrystals: Solid State Landscape and Dehydration Mechanism

Lina C. Harfouche,<sup>†</sup> Nicolas Couvrat,<sup>†</sup> Morgane Sanselme,<sup>†</sup> Clément Brandel,<sup>†</sup> Yohann Cartigny,<sup>†\*</sup> Samuel Petit,<sup>†</sup> and Gérard Coquerel<sup>†‡</sup>

<sup>†</sup> Normandie Univ, UNIROUEN, SMS, 76000 ROUEN, FRANCE.

<sup>‡</sup> Department of Chemical and Materials Engineering, National Central University, 300 Zhongda Road, Zhongli District, Taoyuan City 32001, Taiwan R.O.C.

## Content:

|                                                                                                                                                                     |    |
|---------------------------------------------------------------------------------------------------------------------------------------------------------------------|----|
| Table S 1. Purity and suppliers list of the used coformers.....                                                                                                     | 2  |
| Table S 2. Preparation methods to obtain new cocrystal forms of PXL with six different coformers. ....                                                              | 2  |
| Table S 3. SHG activity for the solid forms obtained with 1:1 molar ratio mixtures of (RS)-PXL and different coformers. ....                                        | 3  |
| Figure S 1. <sup>1</sup> H NMR of the cocrystal obtained between PXL and OA in MeOD. Hydrogens of OA were not detected by NMR in MeOD. ....                         | 3  |
| Figure S 2. <sup>1</sup> H NMR of the cocrystal between PXL and AA in CDCl <sub>3</sub> . ....                                                                      | 4  |
| Figure S 3. <sup>1</sup> H NMR of the cocrystal between PXL and Ant in CDCl <sub>3</sub> . ....                                                                     | 4  |
| Figure S 4. <sup>1</sup> H NMR of the cocrystal between PXL and HBA in (CD <sub>3</sub> ) <sub>2</sub> SO.....                                                      | 5  |
| Figure S 5. <sup>1</sup> H NMR of the cocrystal between PXL and DMCA in MeOD.....                                                                                   | 5  |
| Figure S 6. <sup>1</sup> H NMR of the cocrystal obtained between PXL and DCIBA. ....                                                                                | 6  |
| Figure S 7. <sup>1</sup> H NMR of the cocrystal obtained between PXL and SA.....                                                                                    | 6  |
| Figure S 8. a) XRPD pattern of the starting material (RS)-PXL, Oxalic acid (OA) and (RS)-PXL:OA cocrystal and b) DSC plot of the obtained cocrystal. ....           | 7  |
| Figure S 9. a) XRPD pattern of (RS)-PXL, AA, E-PXL, (RS)-PXL:AA cocrystal and E-PXL:AA cocrystal in 1:1 molar ratio and b) DSC plot of the obtained cocrystals..... | 7  |
| Figure S 10. a) XRPD pattern of (RS)-PXL, Ant and their mixture in 1:1 molar ratio. b) DSC plot for the obtained cocrystal. ....                                    | 8  |
| Figure S 11. a) Powder X-ray diffraction for (RS)-PXL, HBA and (RS)-PXL:HBA cocrystal and b) DSC melting curves of the cocrystal.....                               | 8  |
| Figure S 12. a) XRPD for (RS)-PXL, DCIBA and PXL-DCIBA cocrystal and b) DSC melting curve of the new cocrystal form.....                                            | 9  |
| Figure S 13. a) XRPD for (RS)-PXL, DMCA and (RS)-PXL-DMCA cocrystal and b) DSC melting curve of the obtained cocrystal. ....                                        | 9  |
| Figure S 14. Conformational similarity between the PXL molecules from the asymmetric unit of Form-H (Blue) and Form-A2 (Pink). ....                                 | 10 |
| Figure S 15. Conformational similarity between the SA molecules from the asymmetric unit of Form-H (Blue) and Form-A2 (Pink). ....                                  | 10 |

|                                                                                                                                                                    |    |
|--------------------------------------------------------------------------------------------------------------------------------------------------------------------|----|
| Figure S 16. Sorption-desorption cycle performed at 25 °C for SA with DVS vacuum. Mass change (%) is referred to the mass at the end of the first drying step..... | 11 |
| Figure S 17. XRPD patterns of (RS)-A1, (RS)-A2, E-A1 and the obtained solid after annealing (RS)-A1 at 95oC.....                                                   | 11 |
| Figure S 18. DSC of the anhydrous form A3.....                                                                                                                     | 12 |
| Figure S 19. Experimental and calculated patterns of (E)-H and (RS)-A2 respectively. ....                                                                          | 13 |

*Table S 1. Purity and suppliers list of the used coformers.*

| Coformer                      | Purity | Supplier       |
|-------------------------------|--------|----------------|
| 4-methoxybenzoic acid         | > 98%  | Alfa Aesar     |
| 3-chlorobenzoic acid          | > 99%  | Acros Organics |
| 4-dimethylaminobenzoic acid   | > 98%  | Acros organics |
| 3-hydroxy-4-nitrobenzoic acid | > 98%  | Acros organics |
| 3,4-dichlorobenzoic acid      | > 99%  | Acros organics |
| 2,6-dichlorobenzoic acid      | > 98%  | Acros organics |
| Benzamide                     | > 98%  | Alfa Aesar     |
| Urea                          | > 98%  | VWR Chemicals  |
| Adipic acid                   | > 99%  | Alfa Aesar     |
| Saccharin                     | > 98%  | Acros organics |
| Stearic acid                  | > 97%  | Acros organics |
| Methyl urea                   | > 97%  | Acros organics |
| Citric acid                   | > 98%  | Acros organics |
| Salicylic acid                | > 99%  | Acros organics |
| Acetylsalicylic acid          | > 99%  | Acros organics |
| Anthranilic acid              | > 99%  | Merck          |
| Oxalic acid                   | > 98%  | Alfa Aesar     |
| 3,4-dimethoxycinnamic acid    | > 99%  | Alfa Aesar     |
| 2,5-dichlorobenzoic acid      | > 97%  | Acros Organics |
| 3-hydroxybenzoic acid         | > 99%  | Acros organics |

*Table S 2. Preparation methods to obtain new cocrystal forms of PXL with six different coformers.*

| Coformer                          | Neat Grinding | LAG                                  | Evaporation |
|-----------------------------------|---------------|--------------------------------------|-------------|
| Oxalic acid (OA)                  | +             | Acetone, IPA, DCM, CHCl <sub>3</sub> | /           |
| Acetylsalicylic acid (AA)         | +             | Acetone, heptane, DCM, MeOH, EtOH    | MeOH        |
| Anthranilic acid (Ant)            | +             | Acetone, EtOH, MeOH, DCM             | /           |
| 3-hydroxybenzoic acid (HBA)       | /             | MeOH                                 | /           |
| 3,4-dimethoxycinnamic acid (DMCA) | +             | /                                    | /           |
| 2,5-dichlorobenzoic acid (DCIBA)  | +             | /                                    | Heptane     |

+ : co-crystal formation

/: no new solid phase was identified

Table S 3. SHG activity for the solid forms obtained with 1:1 molar ratio mixtures of (RS)-PXL and different coformers.

| Coformer                          | SHG<br>signal | SHG<br>intensity |
|-----------------------------------|---------------|------------------|
| Oxalic acid (OA)                  | -             | 0                |
| Acetylsalicylic acid (AA)         | +             | 7                |
| Anthranilic acid (Ant)            | +             | 10               |
| 3-hydroxybenzoic acid (HBA)       | +             | 5                |
| 3,4-dimethoxycinnamic acid (DMCA) | +             | 135              |
| 2,5-dichlorobenzoic acid (DCIBA)  | +             | 2258             |

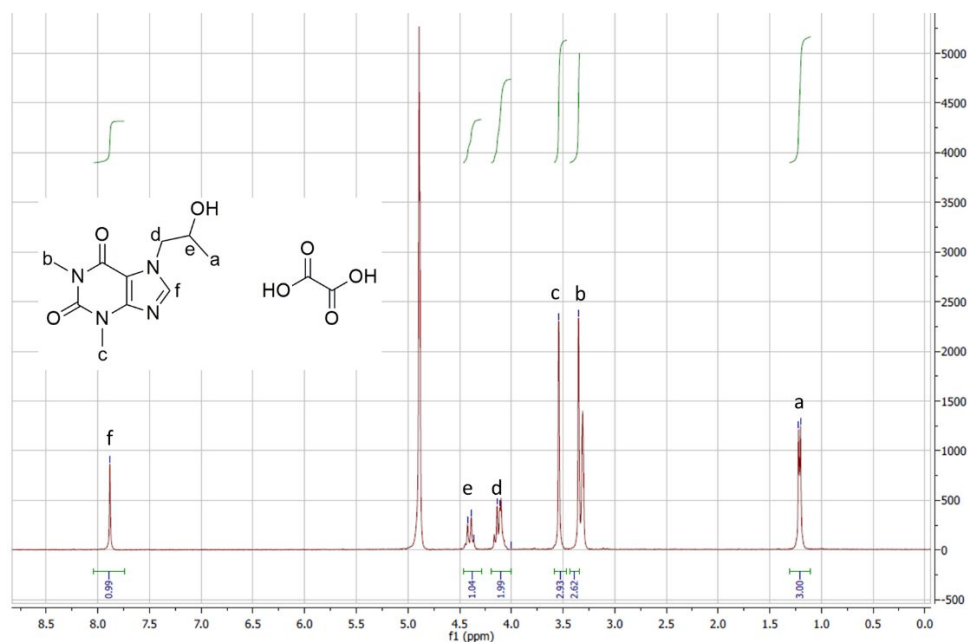

Figure S 1.  $^1\text{H}$  NMR of the cocrystal obtained between PXL and OA in  $\text{MeOD}$ . Hydrogens of OA were not detected by NMR in  $\text{MeOD}$ .

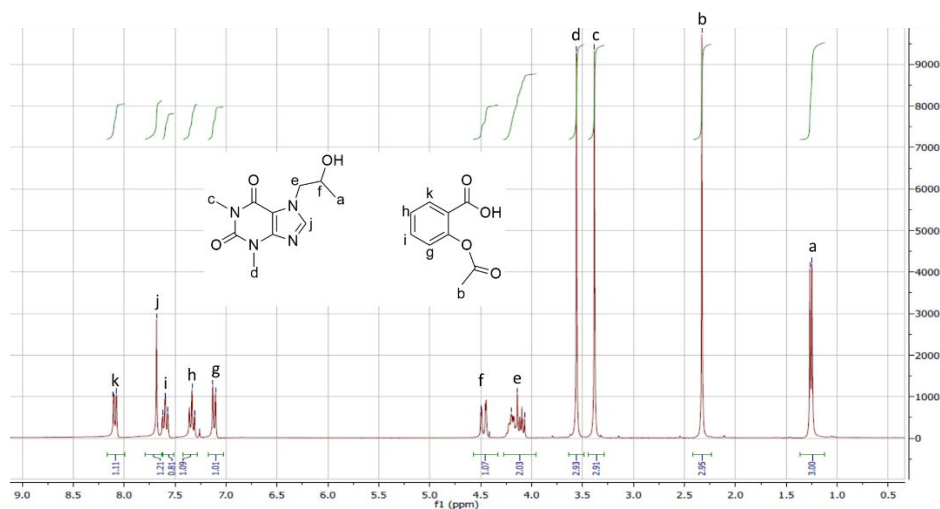

Figure S 2. <sup>1</sup>H NMR of the cocrystal between PXL and AA in CDCl<sub>3</sub>.

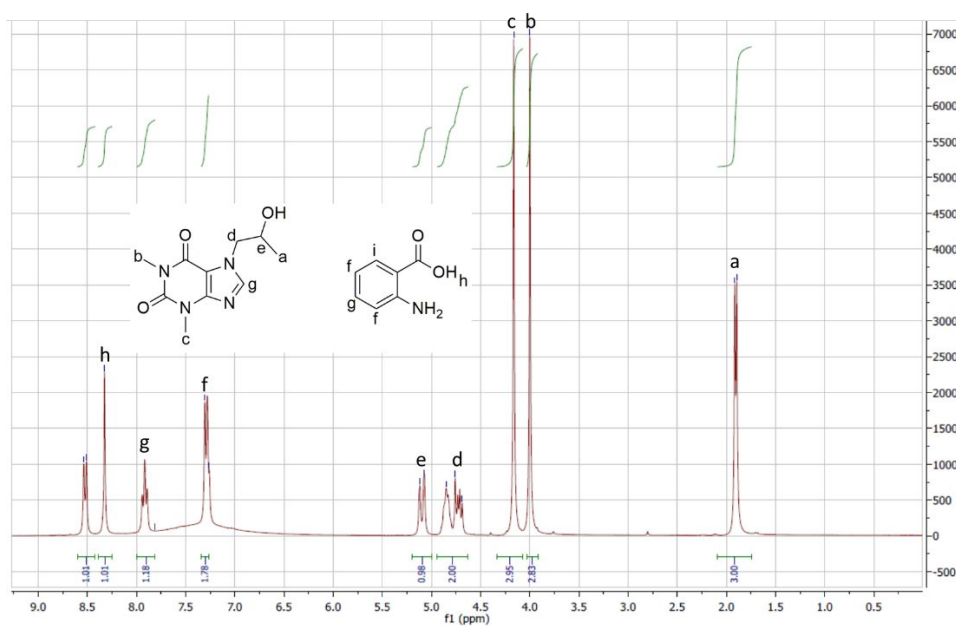

Figure S 3. <sup>1</sup>H NMR of the cocrystal between PXL and Ant in CDCl<sub>3</sub>.

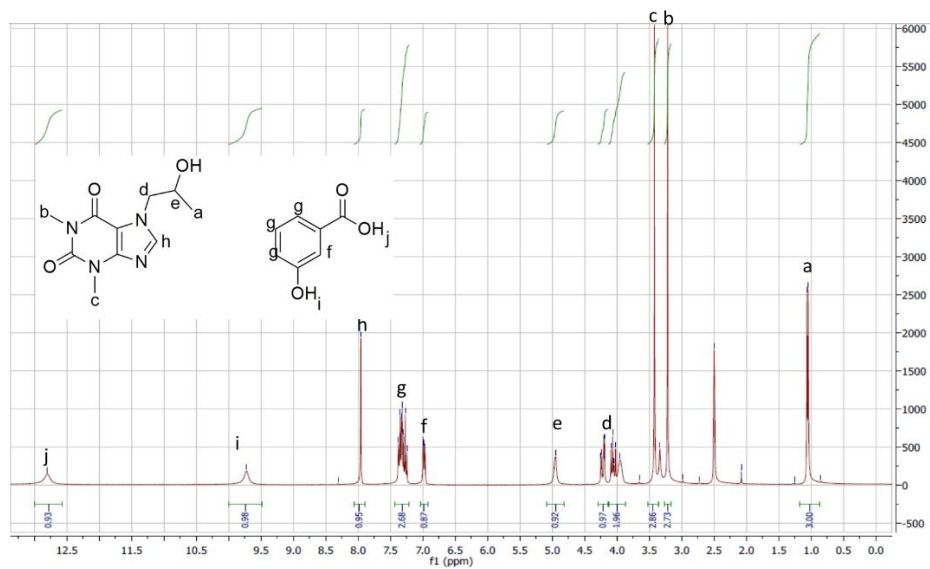

Figure S 4.  $^1\text{H}$  NMR of the cocrystal between PXL and HBA in  $(\text{CD}_3)_2\text{SO}$ .

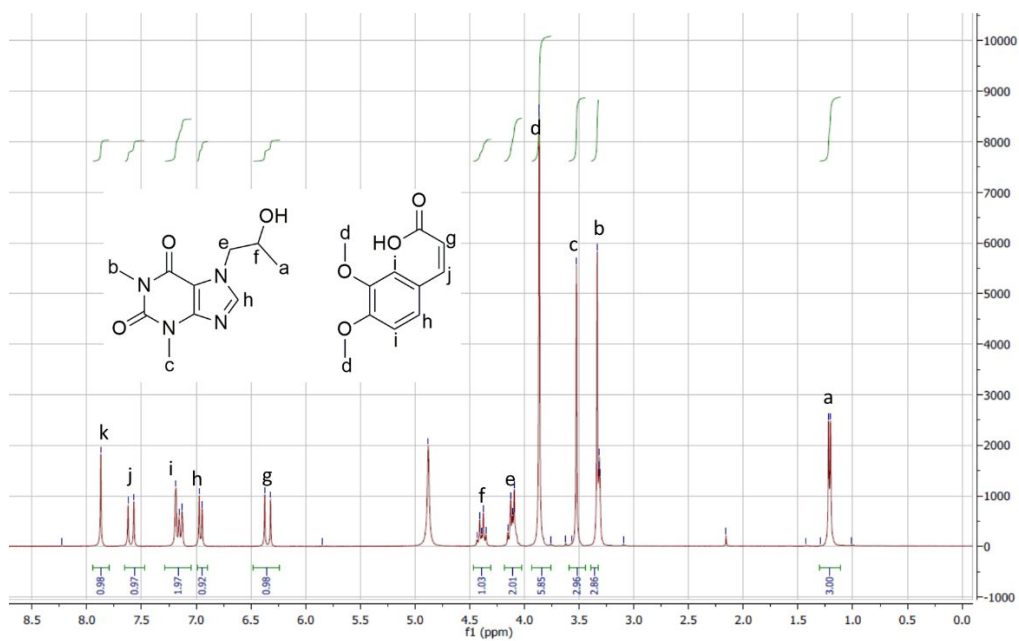

Figure S 5.  $^1\text{H}$  NMR of the cocrystal between PXL and DMCA in MeOD.

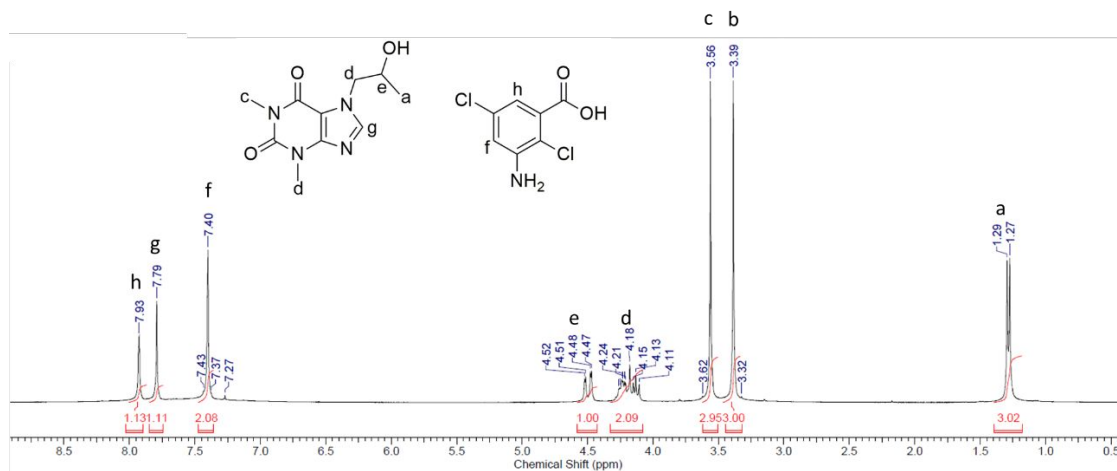

Figure S 6.  $^1\text{H}$  NMR of the cocrystal obtained between PXL and DCIBA.

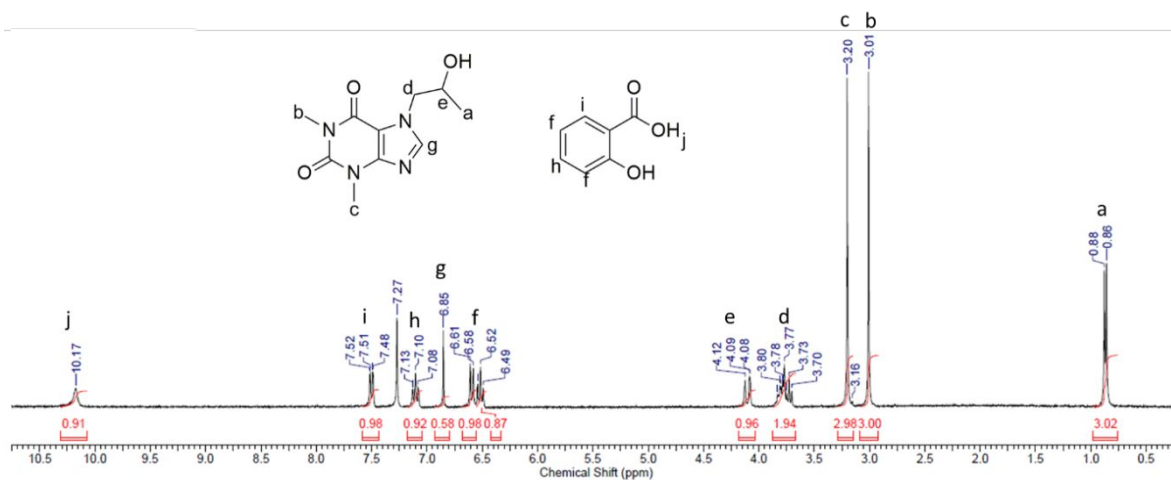

Figure S 7.  $^1\text{H}$  NMR of the cocrystal obtained between PXL and SA.

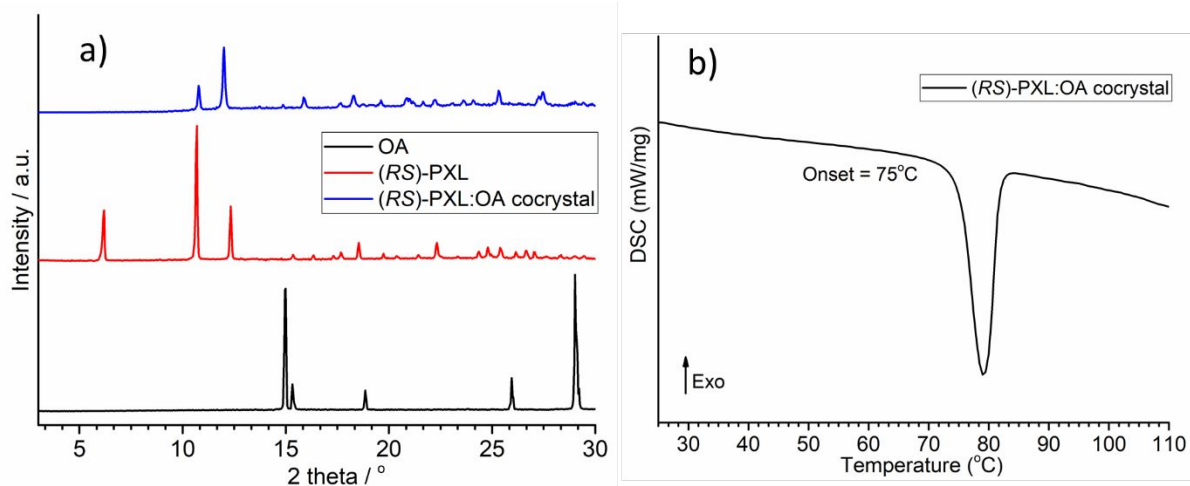

Figure S 8. a) XRPD pattern of the starting material (RS)-PXL, Oxalic acid (OA) and (RS)-PXL:OA cocrystal and b) DSC plot of the obtained cocrystal.

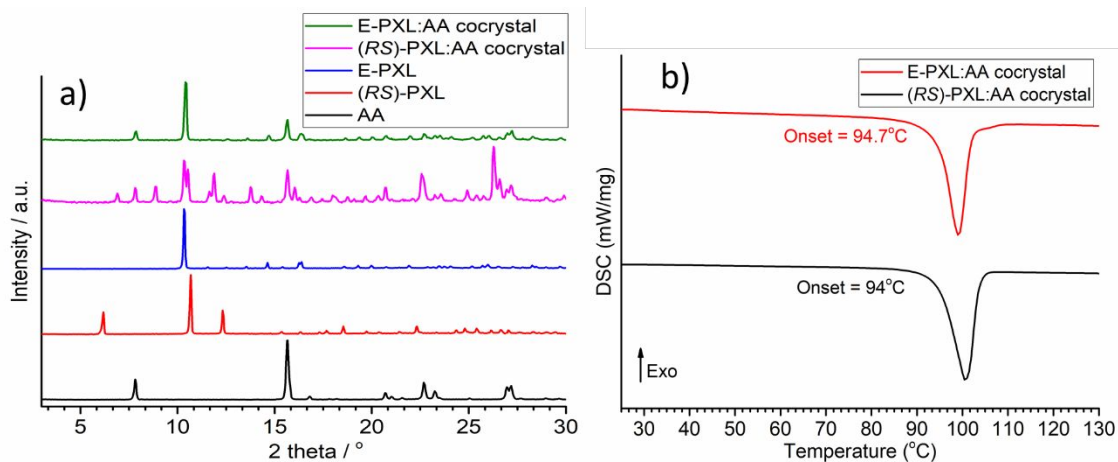

Figure S 9. a) XRPD pattern of (RS)-PXL, AA, E-PXL, (RS)-PXL:AA cocrystal and E-PXL:AA cocrystal in 1:1 molar ratio and b) DSC plot of the obtained cocrystals.

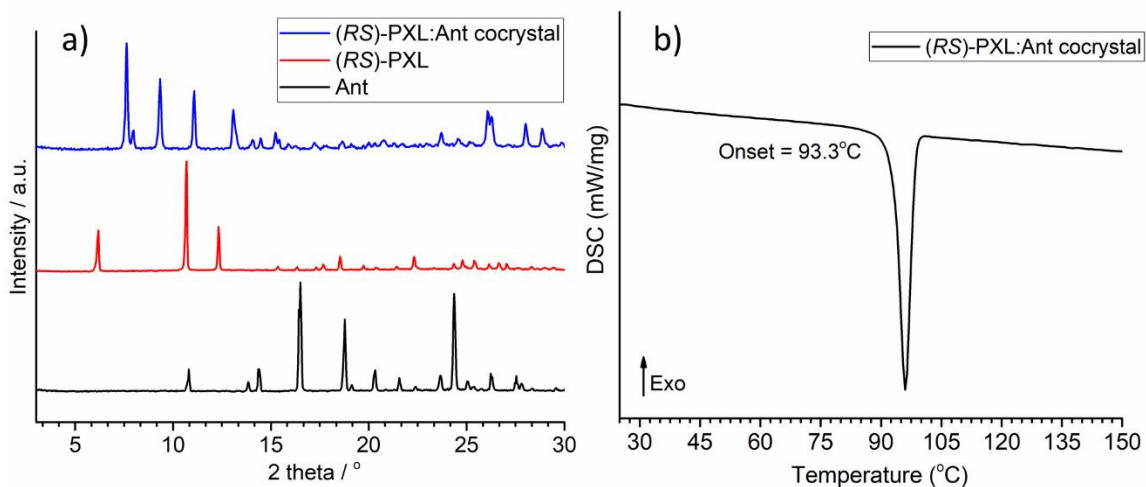

Figure S 10. a) XRPD pattern of (RS)-PXL, Ant and their mixture in 1:1 molar ratio. b) DSC plot for the obtained cocrystal.

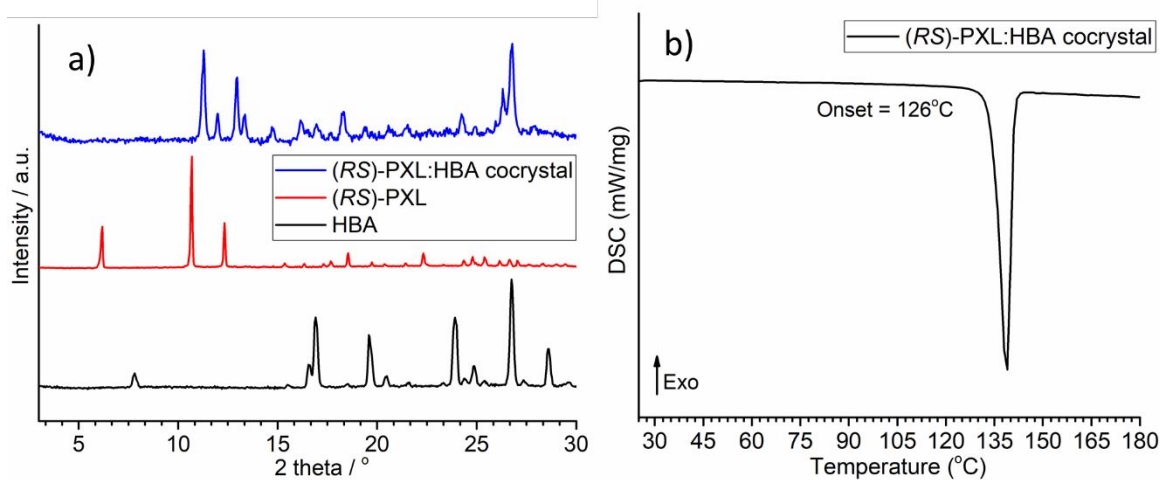

Figure S 11. a) Powder X-ray diffraction for (RS)-PXL, HBA and (RS)-PXL:HBA cocrystal and b) DSC melting curves of the cocrystal.



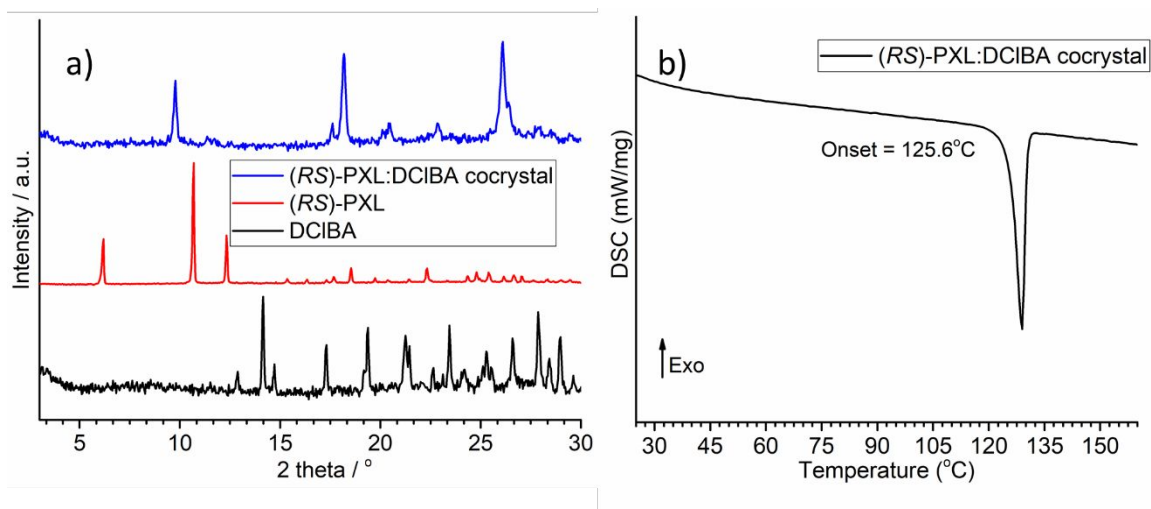

Figure S 12. a) XRPD for (RS)-PXL, DCIBA and PXL-DCIBA cocrystal and b) DSC melting curve of the new cocrystal form.

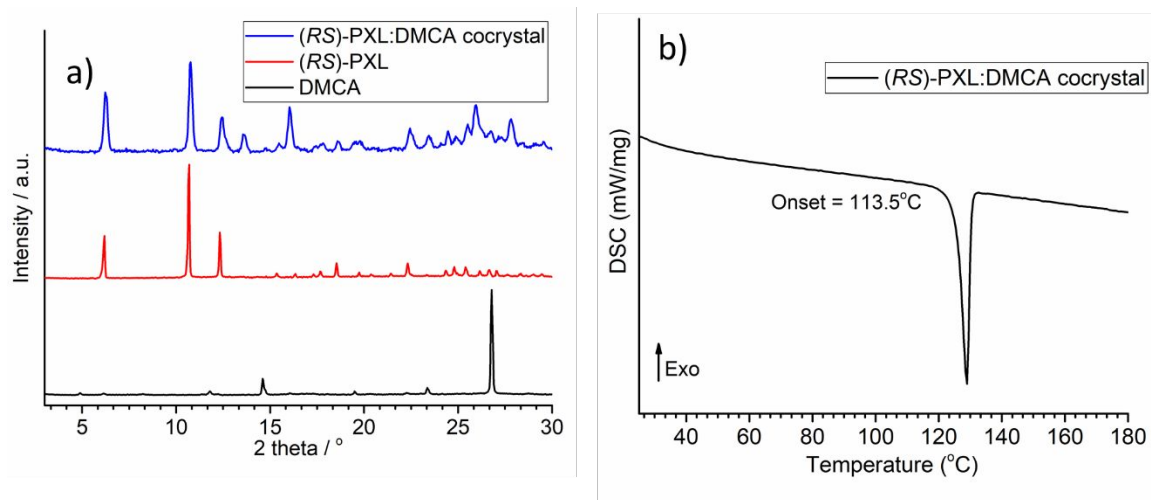

Figure S 13. a) XRPD for (RS)-PXL, DMCA and (RS)-PXL-DMCA cocrystal and b) DSC melting curve of the obtained cocrystal.

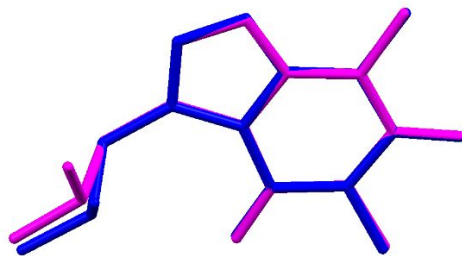

*Figure S 14. Conformational similarity between the PXL molecules from the asymmetric unit of Form-H (Blue) and Form-A2 (Pink).*

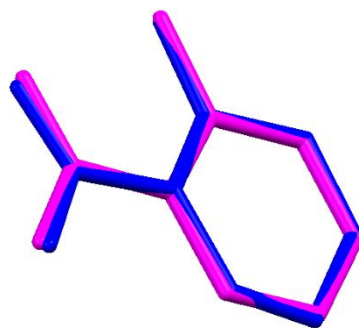

*Figure S 15. Conformational similarity between the SA molecules from the asymmetric unit of Form-H (Blue) and Form-A2 (Pink).*

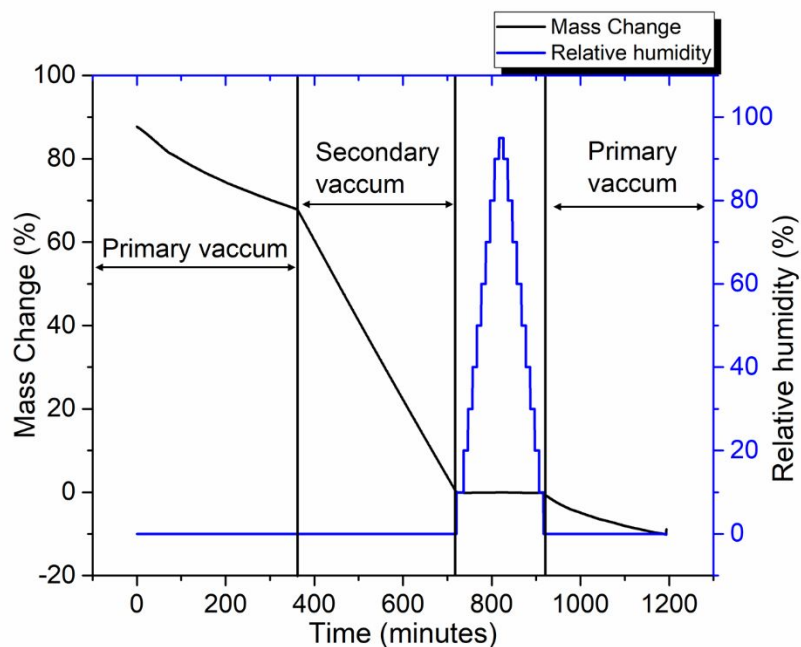

Figure S 16. Sorption-desorption cycle performed at 25 °C for SA with DVS vacuum. Mass change (%) is referred to the mass at the end of the first drying step.

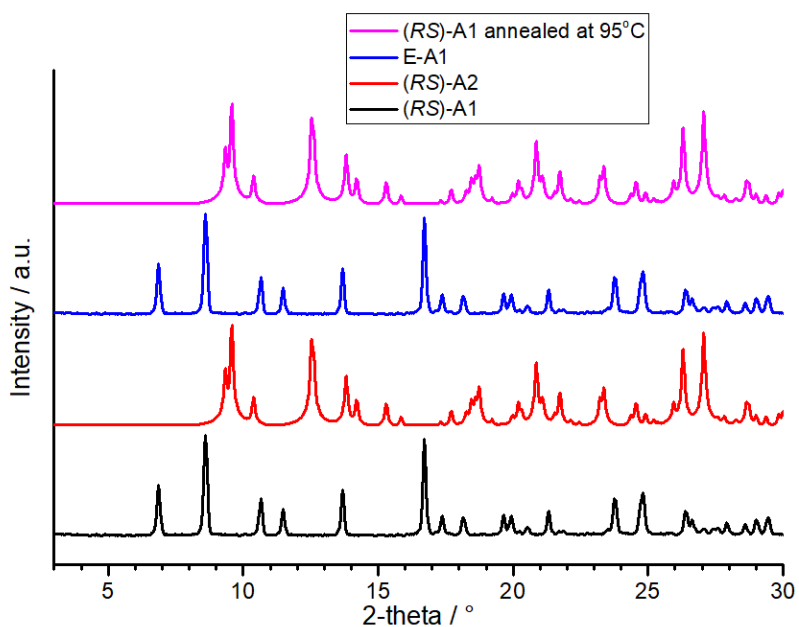

Figure S 17. XRPD patterns of (RS)-A1, (RS)-A2, E-A1 and the obtained solid after annealing (RS)-A1 at 95°C.

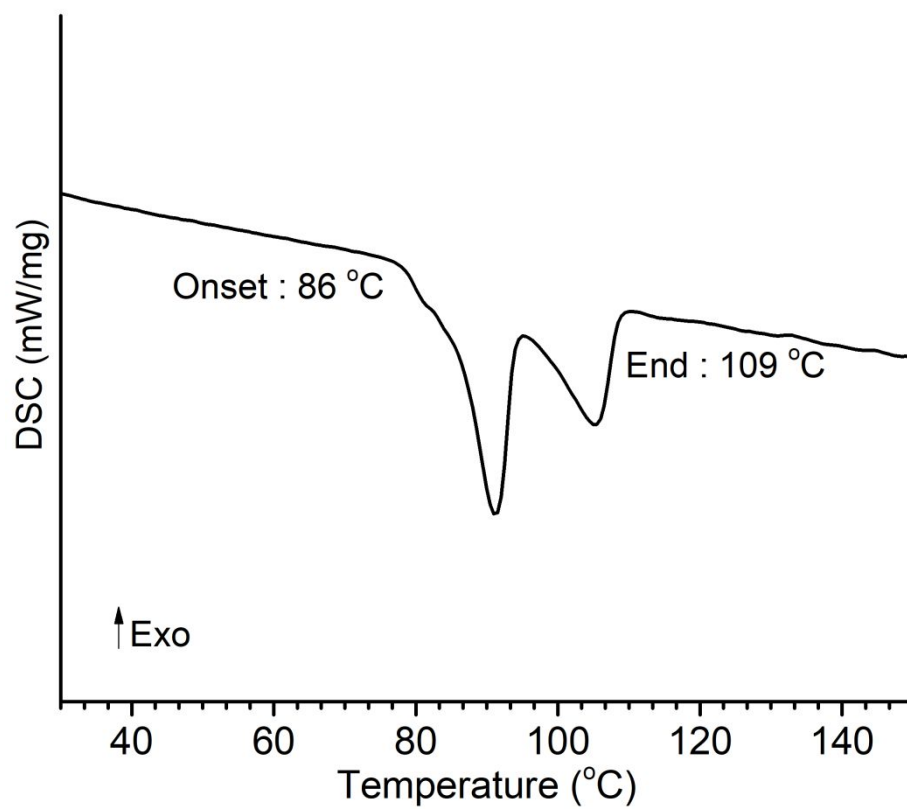

Figure S 18. DSC of the anhydrous form A3.

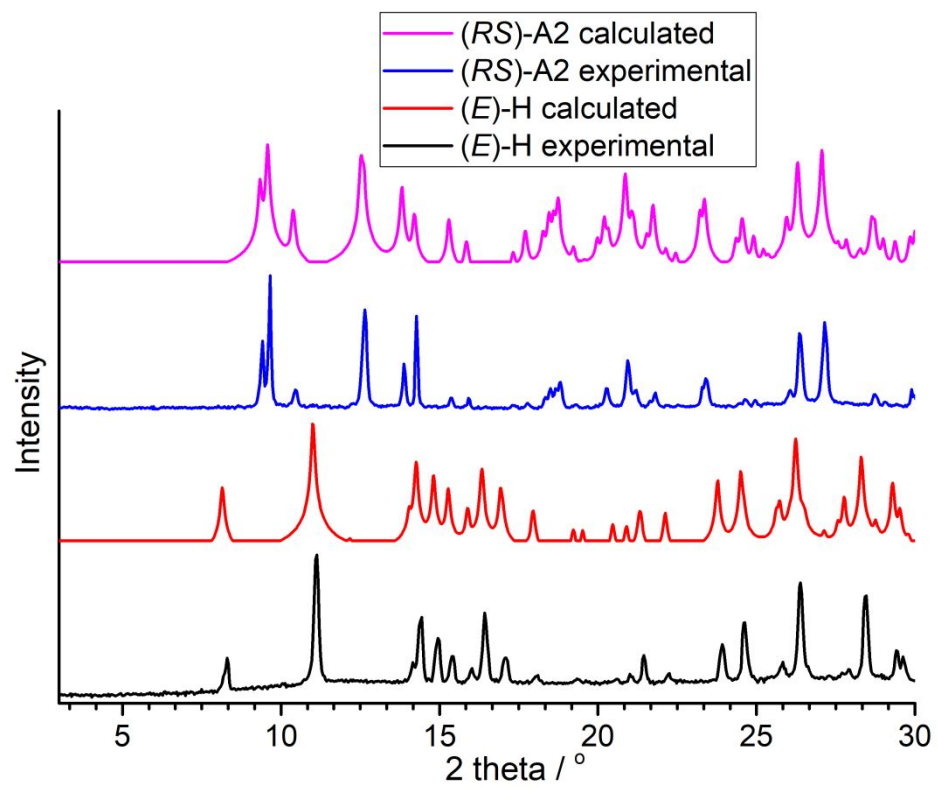

Figure S 19. Experimental and calculated patterns of (E)-H and (RS)-A2 respectively.
